# Supplementary material
Source: PubMed Central journal article supplement (PMC2375611)
Supplement: jphysiol_2007.143941_1.pdf [file jphysiol_2007.143941_1.pdf]

## Supplemental Table 1

### Scheme V

|                   | Control    |            |                                        | 300 nM Zn  |           |                                        |                            | Mean                       | Global |
|-------------------|------------|------------|----------------------------------------|------------|-----------|----------------------------------------|----------------------------|----------------------------|--------|
|                   | mean       | sem        | global fit                             | mean       | sem       | global fit                             | Zn <sup>2+</sup> / Control | Zn <sup>2+</sup> / Control |        |
| <i>k1</i>         | 1200       | 150        | 1100 s <sup>-1</sup>                   | 860        | 80        | 900 s <sup>-1</sup>                    | 0.72                       | 0.82                       |        |
| <i>k2</i>         | 3500       | 830        | 2700 s <sup>-1</sup>                   | 3300       | 530       | 3200 s <sup>-1</sup>                   | 0.94                       | 1.19                       |        |
| <i>k3</i>         | 4600       | 990        | 3800 s <sup>-1</sup>                   | 4700       | 760       | 4200 s <sup>-1</sup>                   | 1.02                       | 1.11                       |        |
| <i>k4</i>         | 2200       | 510        | 1900 s <sup>-1</sup>                   | 2700       | 400       | 2600 s <sup>-1</sup>                   | 1.23                       | 1.37                       |        |
| <i>k5</i>         | 8000       | 2000       | 6300 s <sup>-1</sup>                   | 6200       | 690       | 6500 s <sup>-1</sup>                   | 0.78                       | 1.03                       |        |
| <i>k6</i>         | 1400       | 150        | 1200 s <sup>-1</sup>                   | 1300       | 89        | 1200 s <sup>-1</sup>                   | 0.93                       | 1.00                       |        |
| <i>k7</i>         | 1.4e+9     | --         | 1.4e+9 M <sup>-1</sup> s <sup>-1</sup> | 1.4e+9     | 1.4e+9    | 1.4e+9 M <sup>-1</sup> s <sup>-1</sup> | --                         | --                         |        |
| <i>k8</i>         | <b>49</b>  | <b>10</b>  | <b>47</b> s <sup>-1</sup>              | <b>14</b>  | <b>1</b>  | <b>12</b> s <sup>-1</sup>              | <b>0.29</b>                | <b>0.26</b>                |        |
| <i>k9</i>         | <b>670</b> | <b>190</b> | <b>630</b> s <sup>-1</sup>             | <b>160</b> | <b>12</b> | <b>150</b> s <sup>-1</sup>             | <b>0.24</b>                | <b>0.24</b>                |        |
| <i>kH1</i>        | 360        | 38         | 300 s <sup>-1</sup>                    | 620        | 77        | 610 s <sup>-1</sup>                    | 1.69                       | 2.03                       |        |
| <i>kH2</i>        | 1100       | 220        | 750 s <sup>-1</sup>                    | 2200       | 320       | 2200 s <sup>-1</sup>                   | 2.00                       | 2.93                       |        |
| <i>kH3</i>        | 1300       | 340        | 900 s <sup>-1</sup>                    | 890        | 130       | 820 s <sup>-1</sup>                    | 0.68                       | 0.91                       |        |
| <i>kH4</i>        | 6700       | 1400       | 5800 s <sup>-1</sup>                   | 6300       | 1200      | 6700 s <sup>-1</sup>                   | 0.94                       | 1.16                       |        |
| <i>kH5</i>        | 5000       | 510        | 5500 s <sup>-1</sup>                   | 4400       | 240       | 5000 s <sup>-1</sup>                   | 0.88                       | 0.91                       |        |
| <i>kH6</i>        | 950        | 72         | 1100 s <sup>-1</sup>                   | 990        | 180       | 920 s <sup>-1</sup>                    | 1.04                       | 0.84                       |        |
| <u>LogL event</u> | 5.14       |            | 5.13                                   | 5.03       |           | 5.02                                   |                            |                            |        |

Idealized and segmented current records from the same patches were fit by *Scheme V* as shown in Figure 8C. Records from all 7 patches were fitted individually and also pooled and fitted simultaneously. The proton concentration was 62 nM (pH 7.3). All loops were constrained to obey microscopic reversibility; proton association rate was fixed to  $1.4 \times 10^9 \text{ M}^{-1}\text{s}^{-1}$  (Banke et al., 2005); all other rate constants were free parameters during fitting. The ratio of the fitted rate constants determined in 300 nM Zn<sup>2+</sup> to those determined for control conditions (10 mM tricine, no added Zn<sup>2+</sup>) is given in the far right columns. Rate constants in bold show more than a 3-fold change in the presence of Zn<sup>2+</sup>. Rate constants are given to two significant digits.
